# Supplementary material for: Digital Game-Based Support for Learning the Phlebotomy Procedure in the Biomedical Laboratory Scientist Education
Source: MDPI journal article supplement (doi:10.3390/computers11050059), 2022-04-21
Supplement: s1 [file s1]

Archive with 1 entries (1 files):
- Interview guide.pdf
